# Supplementary material for: Counterintuitive noncovalent interactions of ammonia with the all metal ring of cyclic trinuclear Ag(i) clusters: a DFT study
Source: Royal Society of Chemistry journal article supplement (doi:10.1039/d3nj03420h), 2023-01-01
Supplement: d3nj03420h2.pdf [file d3nj03420h2.pdf]

**Electronic Supplementary Information**

**Counterintuitive noncovalent interactions of ammonia with all metal rings of cyclic trinuclear Ag(I) clusters: A DFT study**

Athanassios C. Tsipis<sup>a</sup>

<sup>a</sup> Laboratory of Inorganic Chemistry, Department of Chemistry, University of Ioannina 45110, Greece

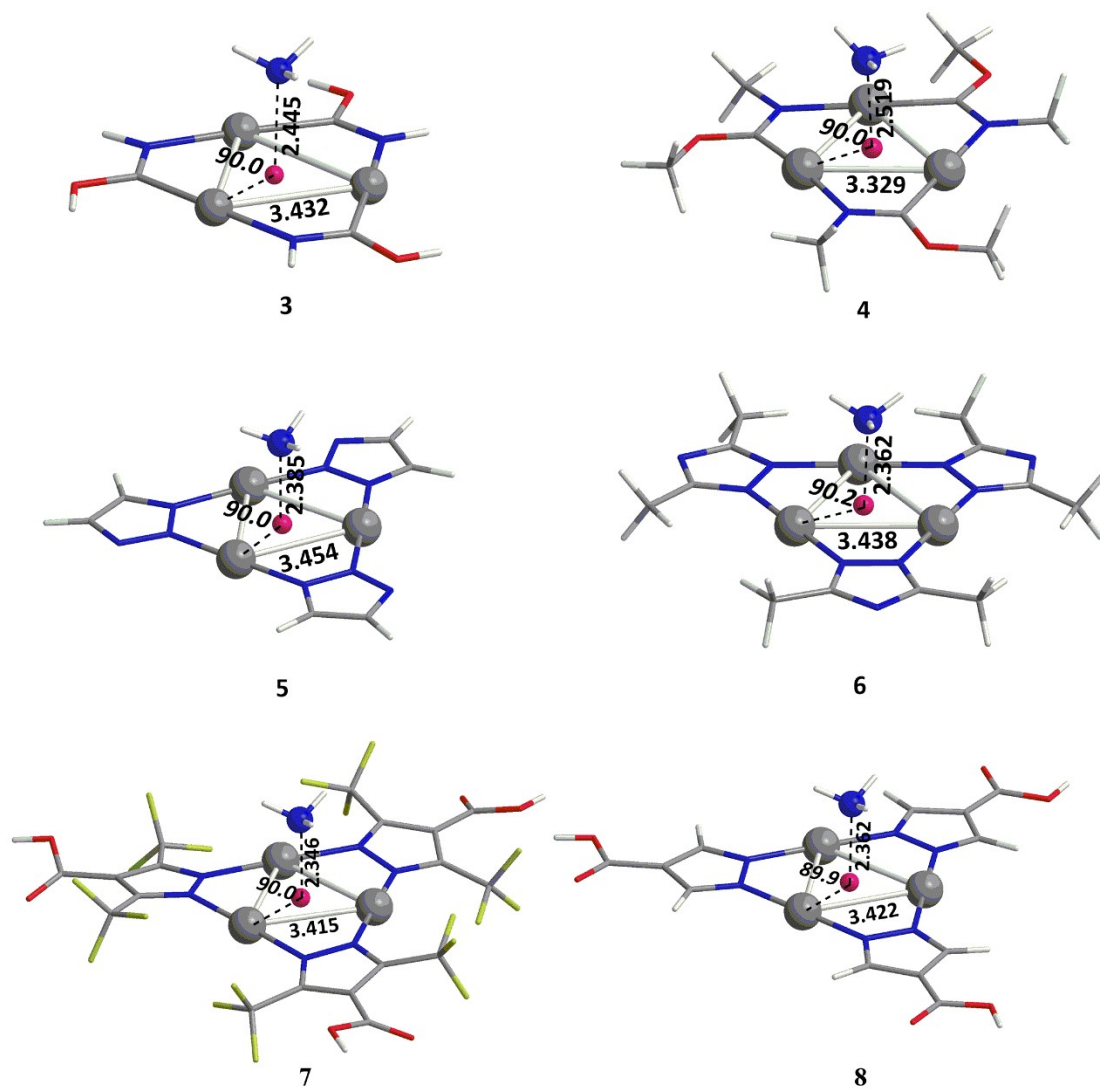

Fig. S1 Selected structural parameters of the optimized geometries of complexes 3 – 8.

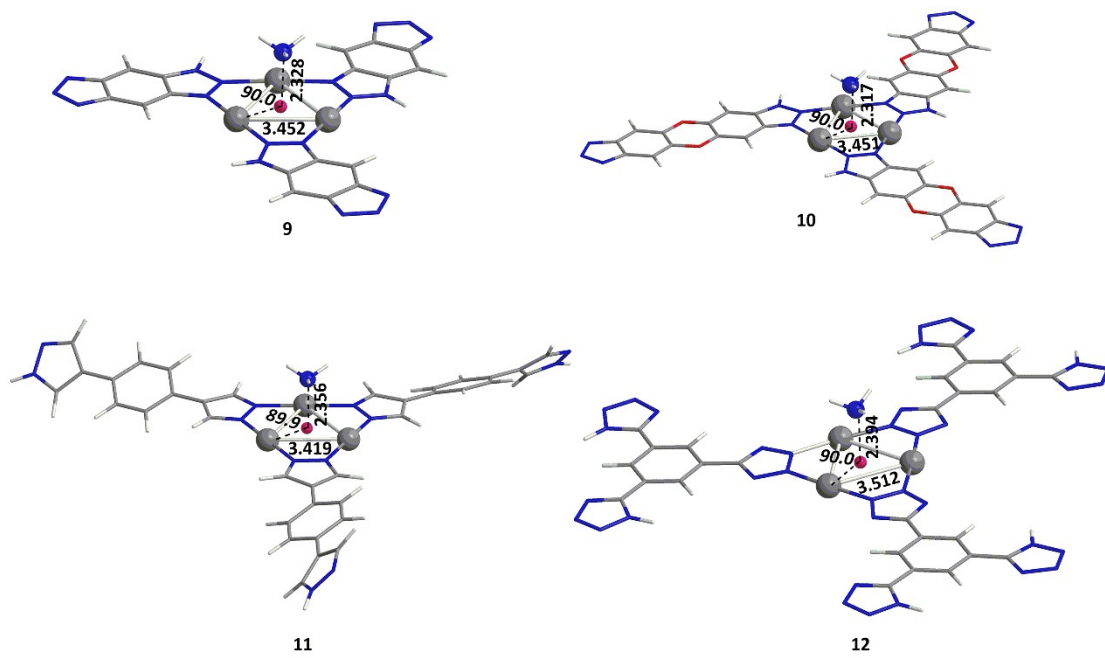

**Fig. S2** Selected structural parameters of the optimized geometries of complexes **9** – **12**.

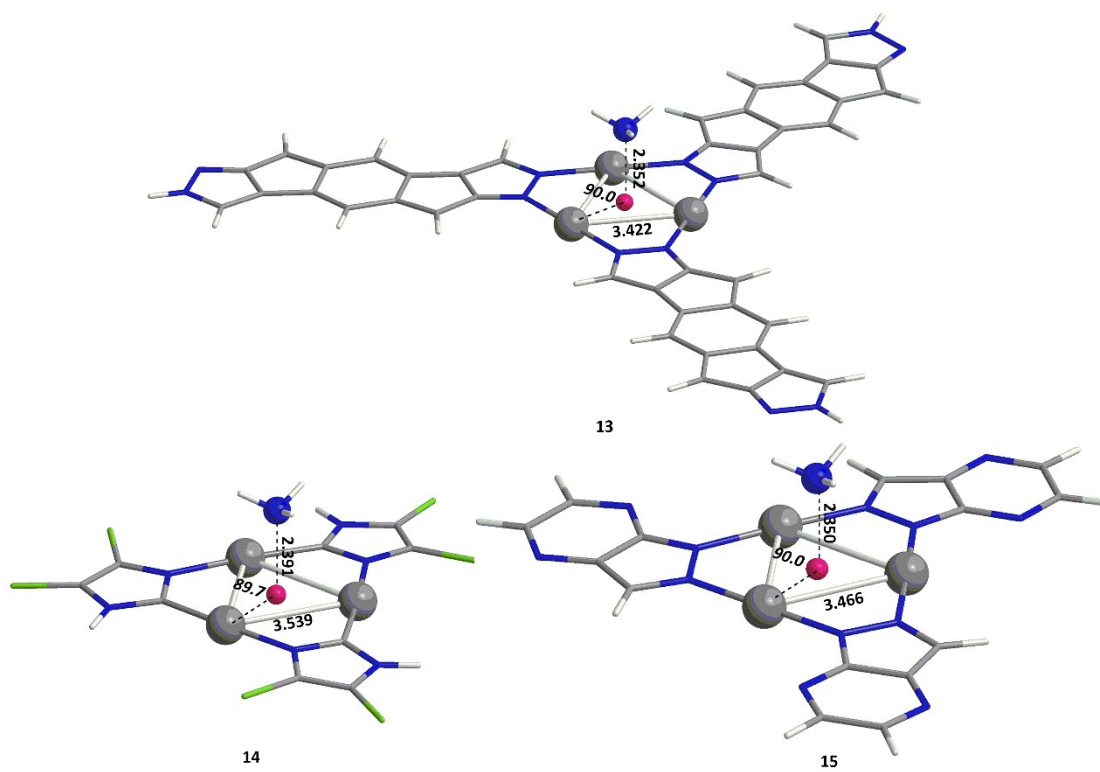

**Fig. S3** Selected structural parameters of the optimized geometries of complexes **13** – **15**.

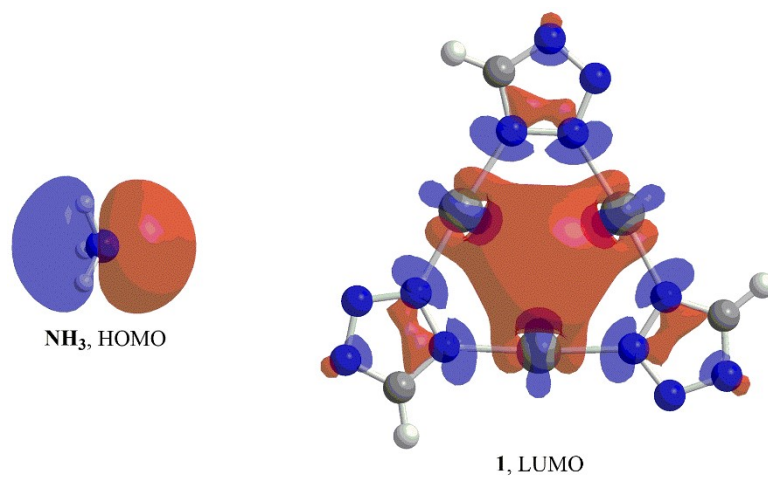

**Fig. S4** 3D surfaces plot of HOMO of NH<sub>3</sub> and LUMO of cluster **1**.

**Table S1** Topological and energetic properties of  $\rho(r)$  calculated at the (3,-1) bond critical point (BCP) of the complexes **1** – **15**.

| Species   | $\rho_{\text{BCP}}^{\text{a}}$ | $\nabla\rho_{\text{BCP}}^{\text{b}}$ | $G_{\text{BCP}}^{\text{c}}$ | $V_{\text{BCP}}^{\text{c}}$ | $ V_{\text{BCP}} /G_{\text{BCP}}$ | $H_{\text{BCP}}^{\text{c}}$ | $G_{\text{BCP}}/\rho_{\text{BCP}}$ | $H_{\text{BCP}}/\rho_{\text{BCP}}^{\text{d}}$ |
|-----------|--------------------------------|--------------------------------------|-----------------------------|-----------------------------|-----------------------------------|-----------------------------|------------------------------------|-----------------------------------------------|
| <b>1</b>  | 0.012                          | 0.037                                | 0.009                       | -0.008                      | 0.889                             | 0.0006                      | 0.750                              | 0.050                                         |
| <b>2</b>  | 0.014                          | 0.044                                | 0.010                       | -0.010                      | 1.000                             | 0.0004                      | 0.714                              | 0.029                                         |
| <b>3</b>  | 0.012                          | 0.035                                | 0.008                       | -0.008                      | 1.000                             | 0.0010                      | 0.667                              | 0.083                                         |
| <b>4</b>  | 0.015                          | 0.047                                | 0.012                       | -0.011                      | 0.917                             | 0.0003                      | 0.800                              | 0.020                                         |
| <b>5</b>  | 0.012                          | 0.038                                | 0.009                       | -0.008                      | 0.889                             | 0.0006                      | 0.750                              | 0.050                                         |
| <b>6</b>  | 0.013                          | 0.041                                | 0.010                       | -0.009                      | 0.900                             | 0.0005                      | 0.769                              | 0.038                                         |
| <b>7</b>  | 0.013                          | 0.041                                | 0.010                       | -0.009                      | 0.900                             | 0.0005                      | 0.769                              | 0.038                                         |
| <b>8</b>  | 0.013                          | 0.040                                | 0.009                       | -0.009                      | 1.000                             | 0.0005                      | 0.692                              | 0.038                                         |
| <b>9</b>  | 0.013                          | 0.041                                | 0.010                       | -0.009                      | 0.900                             | 0.0005                      | 0.769                              | 0.038                                         |
| <b>10</b> | 0.014                          | 0.042                                | 0.010                       | -0.009                      | 0.900                             | 0.0005                      | 0.714                              | 0.036                                         |
| <b>11</b> | 0.013                          | 0.041                                | 0.010                       | -0.009                      | 0.900                             | 0.0005                      | 0.769                              | 0.038                                         |
| <b>12</b> | 0.012                          | 0.036                                | 0.008                       | -0.008                      | 1.000                             | 0.0006                      | 0.667                              | 0.050                                         |
| <b>13</b> | 0.013                          | 0.040                                | 0.010                       | -0.009                      | 0.900                             | 0.0005                      | 0.769                              | 0.038                                         |
| <b>14</b> | 0.012                          | 0.036                                | 0.008                       | -0.008                      | 1.000                             | 0.0006                      | 0.667                              | 0.050                                         |
| <b>15</b> | 0.013                          | 0.039                                | 0.009                       | -0.009                      | 1.000                             | 0.0006                      | 0.692                              | 0.046                                         |

<sup>a</sup> in  $\text{e}\text{\AA}^{-3}$

<sup>b</sup> in  $\text{e}\text{\AA}^{-5}$

<sup>c</sup> in  $\text{kJ mol}^{-1} (\text{atomic unit volume})^{-1}$ .

<sup>d</sup> in  $\text{kJ mol}^{-1} \text{electron}^{-1}$ . The bond degree parameter  $H_{\text{BCP}}/\rho_{\text{BCP}}$  represents either the covalence ( $H_{\text{BCP}}<0$ ) or the softening ( $H_{\text{BCP}}>0$ ) degree of the interaction.

**Table S2** Calculated parameters used for molecular structure – property correlations.<sup>1</sup>

| Species | $Q_{zz}$ | $Q_{xx}$ | $E_{\text{HOMO}}^2$ | $E_{\text{LUMO}}^2$ | $\mu$  | $\eta$ | $\omega$ | $\chi$ | $\alpha$ | $q_{\text{Ag}}$ Mul. |
|---------|----------|----------|---------------------|---------------------|--------|--------|----------|--------|----------|----------------------|
| 1       | -137.550 | -173.880 | -0.3069             | -0.0668             | 0.187  | 0.24   | 0.004    | -0.187 | 226.61   | 0.248                |
| 2       | -260.502 | -299.350 | -0.3144             | -0.0826             | 0.199  | 0.232  | 0.005    | -0.199 | 325.57   | 0.260                |
| 3       | -113.289 | -99.277  | -0.2360             | -0.0184             | 0.127  | 0.218  | 0.002    | -0.127 | 180.83   | 0.108                |
| 4       | -150.518 | -133.432 | -0.2214             | -0.0054             | 0.113  | 0.216  | 0.001    | -0.113 | 278.75   | 0.067                |
| 5       | -144.241 | -135.499 | -0.2758             | -0.0415             | 0.159  | 0.234  | 0.003    | -0.159 | 242.05   | 0.223                |
| 6       | -183.416 | -180.167 | -0.2546             | -0.0365             | 0.146  | 0.218  | 0.002    | -0.146 | 335.49   | 0.168                |
| 7       | -312.177 | -328.484 | -0.3012             | -0.0801             | 0.191  | 0.221  | 0.004    | -0.191 | 428.23   | 0.284                |
| 8       | -192.403 | -187.498 | -0.2766             | -0.0506             | 0.164  | 0.226  | 0.003    | -0.164 | 357.02   | 0.195                |
| 9       | -258.854 | -438.13  | -0.2447             | -0.1366             | 0.191  | 0.108  | 0.002    | -0.191 | 623.21   | 0.301                |
| 10      | -394.153 | -939.93  | -0.2166             | -0.1672             | 0.192  | 0.049  | 0.001    | -0.192 | 1647.69  | 0.296                |
| 11      | -331.963 | -368.73  | -0.2158             | -0.0346             | 0.125  | 0.181  | 0.001    | -0.125 | 825.13   | 0.171                |
| 12      | -404.95  | -567.02  | -0.2914             | -0.0925             | 0.192  | 0.199  | 0.004    | -0.192 | 890.28   | 0.297                |
| 13      | -375.484 | -305.22  | -0.2054             | -0.0984             | 0.152  | 0.107  | 0.001    | -0.152 | 1234.41  | 0.172                |
| 14      | -218.54  | -205.117 | -0.238              | -0.0191             | -0.129 | 0.219  | 0.002    | 0.129  | 375.61   | 0.172                |
| 15      | -210.08  | -200.142 | -0.2609             | -0.0766             | -0.169 | 0.184  | 0.003    | 0.169  | 439.46   | 0.178                |

<sup>1</sup>Data refer to the Ag(I) clusters.

<sup>2</sup>HOMO and LUMO energies are given in a.u.

**Table S3** Calculated parameters used for molecular structure – property correlations.<sup>1</sup>

| Species | $\rho$ (D) | $Q_{zz}$ | $Q_{xx}$ | $E_{\text{HOMO}}^2$ | $E_{\text{LUMO}}^2$ | $\mu$ | $\eta$ | $\omega$ | $\chi$ | $q_{\text{Ag Mul}}$ | $q_{\text{N Mul}}$ | $q_{\text{Ag}}$ | $q_{\text{N}}$ | $R_e$ | $D_0$ |
|---------|------------|----------|----------|---------------------|---------------------|-------|--------|----------|--------|---------------------|--------------------|-----------------|----------------|-------|-------|
| 1       | 2.577      | -137.550 | -173.880 | -0.29661            | -0.04988            | 0.173 | 0.247  | 0.004    | -0.173 | 0.248               | -0.727             | 0.622           | -1.072         | 2.399 | 8.7   |
| 2       | 2.640      | -259.251 | -311.766 | -0.30441            | -0.06652            | 0.185 | 0.238  | 0.004    | -0.185 | 0.260               | -0.727             | 0.623           | -1.066         | 2.358 | 9.7   |
| 3       | 2.027      | -113.675 | -109.120 | -0.22714            | -0.01097            | 0.119 | 0.216  | 0.002    | -0.119 | 0.108               | -0.709             | 0.400           | -1.061         | 2.445 | 4.6   |
| 4       | 1.900      | -150.876 | -143.914 | -0.20973            | -0.00391            | 0.107 | 0.206  | 0.001    | -0.107 | 0.067               | -0.692             | 0.400           | -1.048         | 2.519 | 4.2   |
| 5       | 2.347      | -143.749 | -146.512 | -0.26691            | -0.02574            | 0.146 | 0.241  | 0.003    | -0.146 | 0.223               | -0.720             | 0.608           | -1.068         | 2.385 | 7.4   |
| 6       | 2.339      | -179.952 | -195.183 | -0.24948            | -0.02110            | 0.135 | 0.228  | 0.002    | -0.135 | 0.168               | -0.718             | 0.575           | -1.061         | 2.362 | 7.0   |
| 7       | 3.486      | -311.156 | -341.768 | -0.29287            | -0.06556            | 0.179 | 0.227  | 0.004    | -0.179 | 0.284               | -0.725             | 0.626           | -1.063         | 2.346 | 9.7   |
| 8       | 3.704      | -192.403 | -187.498 | -0.27167            | -0.03587            | 0.154 | 0.236  | 0.003    | -0.154 | 0.195               | -0.722             | 0.609           | -1.068         | 2.362 | 7.9   |
| 9       | 3.032      | -256.517 | -453.995 | -0.24119            | -0.13143            | 0.186 | 0.110  | 0.002    | -0.186 | 0.301               | -0.739             | 0.575           | -1.094         | 2.328 | 12.2  |
| 10      | 6.062      | -391.490 | -962.712 | -0.21416            | -0.16353            | 0.189 | 0.051  | 0.001    | -0.189 | 0.296               | -0.738             | 0.638           | -1.079         | 2.317 | 12.4  |
| 11      | 3.830      | -331.963 | -368.730 | -0.21327            | -0.02846            | 0.121 | 0.185  | 0.001    | -0.121 | 0.171               | -0.720             | 0.598           | -1.067         | 2.356 | 7.3   |
| 12      | 1.927      | -403.034 | -582.044 | -0.28901            | -0.09059            | 0.190 | 0.198  | 0.004    | -0.190 | 0.309               | -0.729             | 0.628           | -1.073         | 2.394 | 9.0   |
| 13      | 2.239      | -374.720 | -322.084 | -0.20311            | -0.09643            | 0.150 | 0.107  | 0.001    | -0.150 | 0.172               | -0.719             | 0.597           | -1.066         | 2.352 | 7.2   |
| 14      | 1.877      | -218.583 | -216.583 | -0.23389            | -0.01210            | 0.123 | 0.222  | 0.002    | -0.123 | 0.030               | -0.712             | 0.469           | -1.057         | 2.391 | 5.2   |
| 15      | 2.345      | -209.501 | -212.720 | -0.25635            | -0.07283            | 0.165 | 0.184  | 0.002    | -0.165 | 0.190               | -0.721             | 0.605           | -1.066         | 2.350 | 7.7   |

<sup>1</sup>Data refer to the ammonia complexes.<sup>2</sup>HOMO and LUMO energies are given in a.u.
