# Supplementary figures and images for: Counterintuitive noncovalent interactions of ammonia with the all metal ring of cyclic trinuclear Ag(i) clusters: a DFT study
Source: Royal Society of Chemistry journal article supplement (doi:10.1039/d3nj03420h), 2023-01-01

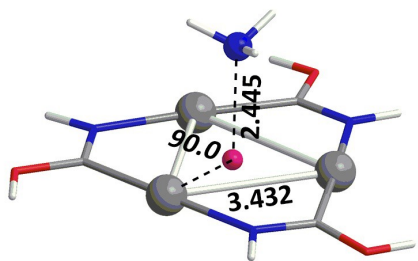

3

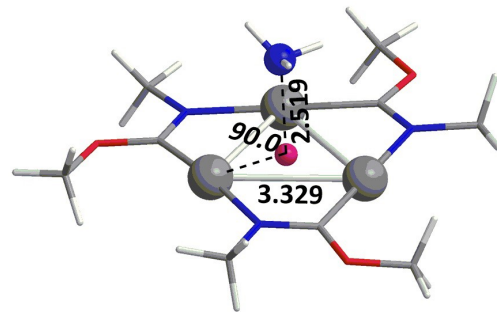

4

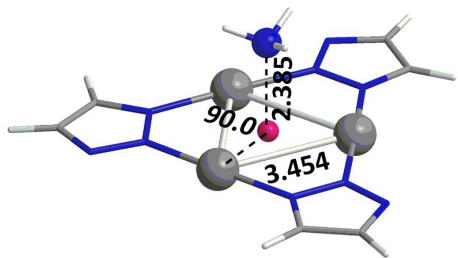

5

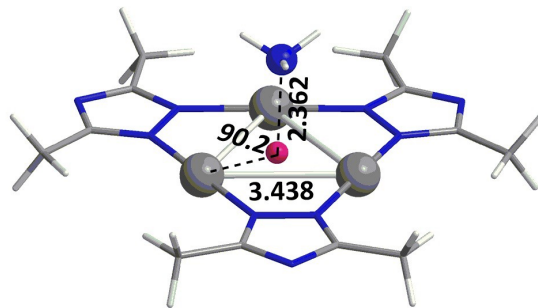

6

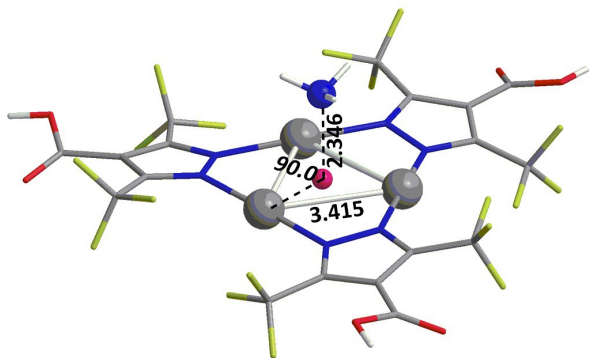

7

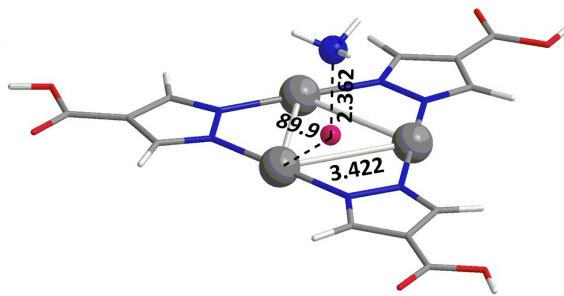

8

Supplement: d3nj03420h3.pdf [file d3nj03420h3.pdf]

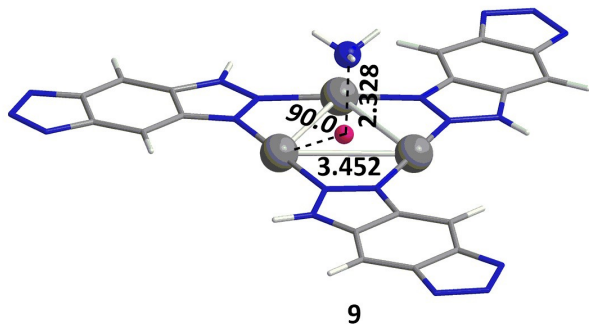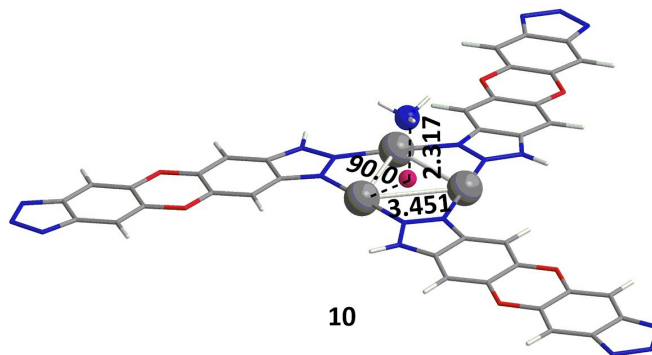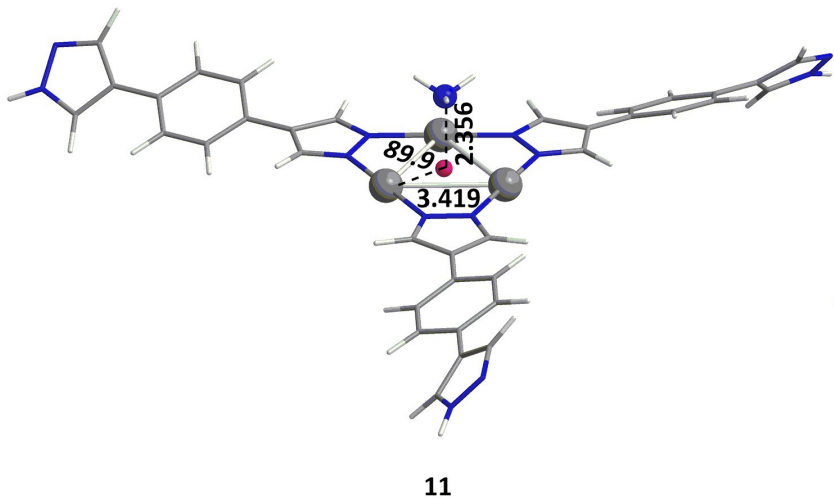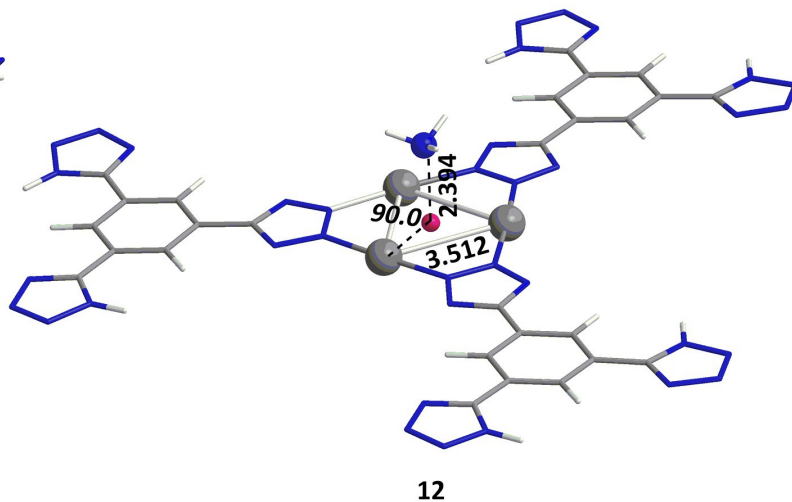

Supplement: d3nj03420h4.pdf [file d3nj03420h4.pdf]

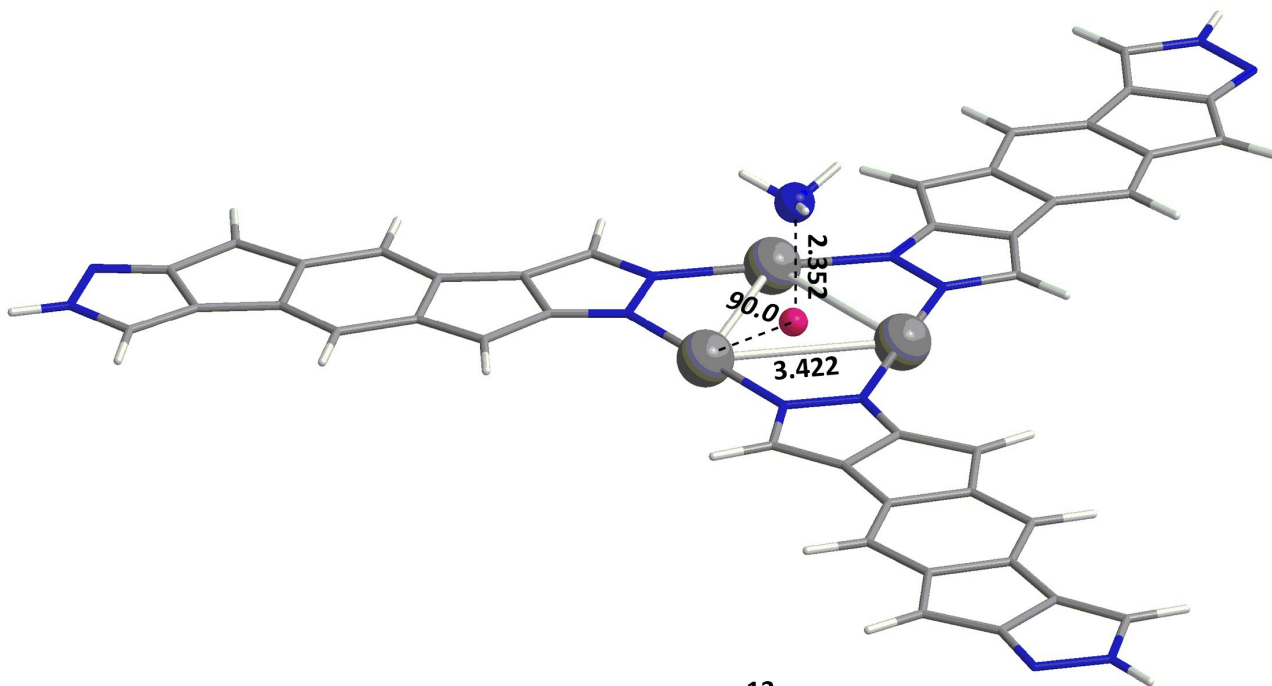

13

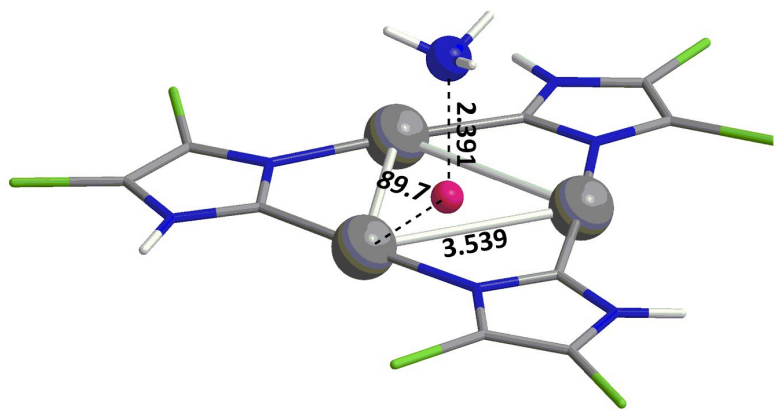

14

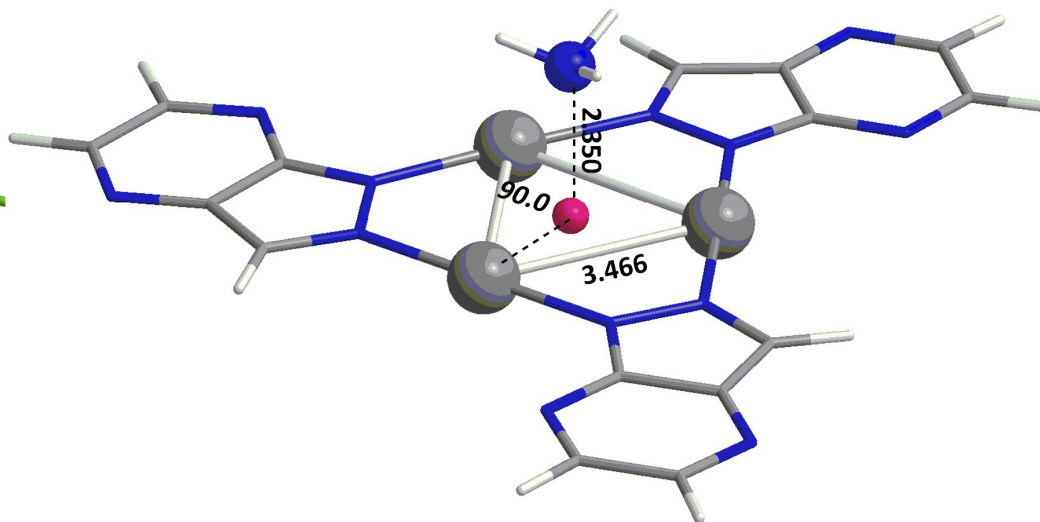

15

Supplement: d3nj03420h5.pdf [file d3nj03420h5.pdf]

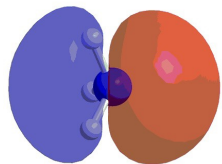

$\text{NH}_3$ , HOMO

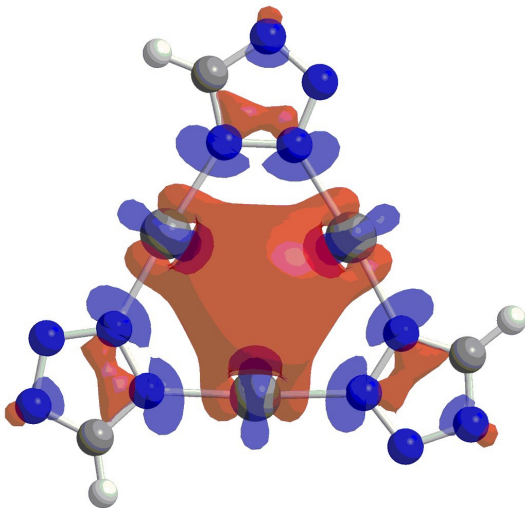

**1**, LUMO

Supplement: d3nj03420h6.pdf [file d3nj03420h6.pdf]
